# Supplementary material for: Solvent-free synthesis of a 2D biochar stabilized nanoscale zerovalent iron composite for the oxidative degradation of organic pollutants
Source: Royal Society of Chemistry journal article supplement (doi:10.1039/c8ta11661j), 2019-01-01
Supplement: c8ta11661j1.pdf [file c8ta11661j1.pdf]

**Electronic Supplementary Information for**

**Solvent-free carbothermal synthesis of 2D biochar stabilized nanoscale  
zerovalent iron composite for the oxidative degradation of organic pollutant**

Xiao-Hu Dai<sup>a,b</sup>, Hao-Xiang Fan<sup>a</sup>, Chun-Yan Yi<sup>c</sup>, Bing Dong<sup>a,b</sup>, Shi-Jie Yuan<sup>a,b\*</sup>

<sup>a</sup> State Key Laboratory of Pollution Control and Resource Reuse, College of  
Environmental Science and Engineering, Tongji University, Shanghai, 200092, China

<sup>b</sup> Shanghai Institute of Pollution Control and Ecological Security, Shanghai, 200092,  
China

<sup>c</sup> Shanghai Institutes for Biological Sciences, Chinese Academy of Sciences, Shanghai,  
200031, China

**\*Corresponding author:**

Dr. Shi-Jie Yuan, Phone: +86-21-65986297; Fax: +86-21-65983602; E-mail:

[ysj@tongji.edu.cn](mailto:ysj@tongji.edu.cn)

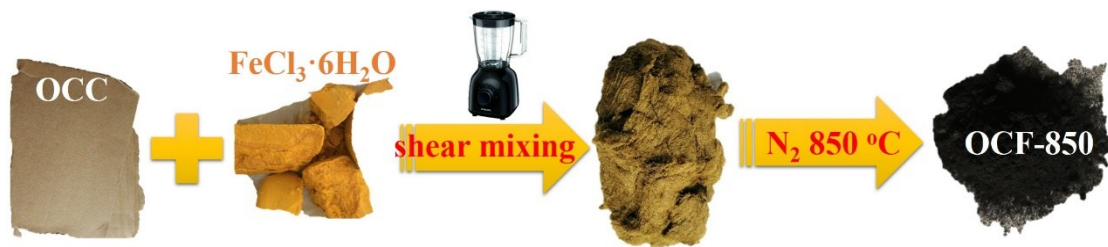

Scheme s1. Schematic illustration of the procedure used to construct the nZVI/biochar OCF-850.

Table s1. Comparison of the synthesis catalytic activity of different catalysts

| Starting materials                                                                                                                                           | Fe preloaded process                                                                                                                                                                            | Reduction process                                                                                 | Structure                                                                           | PMS/PMS catalyst                                                    | Fenton catalyst                                                                                    | Reference                                     |
|--------------------------------------------------------------------------------------------------------------------------------------------------------------|-------------------------------------------------------------------------------------------------------------------------------------------------------------------------------------------------|---------------------------------------------------------------------------------------------------|-------------------------------------------------------------------------------------|---------------------------------------------------------------------|----------------------------------------------------------------------------------------------------|-----------------------------------------------|
| old corrugated containers, FeCl <sub>3</sub> ·6H <sub>2</sub> O                                                                                              | shear mixing                                                                                                                                                                                    | carbonization                                                                                     | graphene oxide-like 2D biochar stabilized nZVI                                      | 30 mg/L BPA were nearly completely removed in 15 min at pH 7        | 30 mg/L BPA were nearly completely removed in 25 min at pH 7                                       | This work                                     |
|                                                                                                                                                              |                                                                                                                                                                                                 |                                                                                                   |                                                                                     |                                                                     |                                                                                                    |                                               |
| graphite powder, FeSO <sub>4</sub> ·7H <sub>2</sub> O                                                                                                        | graphite powder oxidized to graphene oxide by Hummers method, graphene oxide and methanol/water were ultrasonically stirred, FeSO <sub>4</sub> ·7H <sub>2</sub> O added                         | NaBH <sub>4</sub> solution was dropwise added with vigorous stirring under nitrogen atmosphere.   | nZVI dispersed on the surface of graphene                                           | persulfate activation with 92.1% of atrazine removed within 21 min. | unknown                                                                                            | <i>Chemical Eng. J.</i> 2018,341, 126-136     |
| graphite powder, NaNO <sub>3</sub> H <sub>2</sub> SO <sub>4</sub> , KMnO <sub>4</sub> , H <sub>2</sub> O <sub>2</sub> , FeSO <sub>4</sub> ·7H <sub>2</sub> O | graphite powder oxidized to graphene oxide by Hummers method, graphene oxide and ultrapure water were sonicated for 2 h. 3 g FeSO <sub>4</sub> ·7H <sub>2</sub> O added                         | NaBH <sub>4</sub> dissolved in ultrapure water was dropwise added to the flask at 20°C for 2.5 h. | reduced graphene oxide supported nZVI                                               | nearly complete dechlorination of TCE was obtained                  | nearly complete dechlorination of TCE was obtained                                                 | <i>J. Hazard. Mater.</i> 2018, 349, 35-44     |
| Graphite flask, FeCl <sub>3</sub> ·6H <sub>2</sub> O, FeSO <sub>4</sub> ·7H <sub>2</sub> O and NaBH <sub>4</sub>                                             | Preparation of Fe <sub>3</sub> O <sub>4</sub> -rGO was redispersed in oxygen free water. FeSO <sub>4</sub> ·7H <sub>2</sub> O dissolved in deionized water and then transferred to the solution | NaBH <sub>4</sub> alkaline aqueous was added                                                      | nZVI immobilized on magnetic Fe <sub>3</sub> O <sub>4</sub> -reduced graphene oxide | unknown                                                             | 98.0% removal of 50 mg/L MB achieved within 60 min at pH 3.00                                      | <i>J. Water Process Eng.</i> 2015, 5, 101-111 |
| Expandable graphite, FeSO <sub>4</sub> ·7H <sub>2</sub> O and NaBH <sub>4</sub>                                                                              | FeSO <sub>4</sub> ·7H <sub>2</sub> O dissolved in 200 mL deionized water and mixed with the fresh Fe <sub>3</sub> O <sub>4</sub> /graphene oxide under vigorous mechanical stirring for 60 min  | NaBH <sub>4</sub> was added dropwise and stirred for 60 min                                       | Fe <sup>0</sup> /Fe <sub>3</sub> O <sub>4</sub> /graphene composite                 | unknown                                                             | Methyl Orange (94.78%), Methylene Blue (91.60%) and Crystal Violet (89.07%) were removal in 20 min | <i>J. Environ. Sci.</i> 2016, 44, 148-157     |

|                                                    |                                                                                                                                                          |                                                                                  |                                                        |                                                                              |                                                                                                                 |                                                |
|----------------------------------------------------|----------------------------------------------------------------------------------------------------------------------------------------------------------|----------------------------------------------------------------------------------|--------------------------------------------------------|------------------------------------------------------------------------------|-----------------------------------------------------------------------------------------------------------------|------------------------------------------------|
| sawdust,<br>FeCl <sub>3</sub> ·6H <sub>2</sub> O   | sawdust was added FeCl <sub>3</sub> ·6H <sub>2</sub> O solution, the mixture was rotary evaporation, and the residue was dried at 80 °C overnight.       | carbonization                                                                    | nanofiber structure                                    | 20 mg/L of BPA were completely removed in 5 min                              | unknown                                                                                                         | <i>Chemical Eng. J.</i> 2019,359, 572-583      |
| rice hull,<br>FeSO <sub>4</sub> ·7H <sub>2</sub> O | Biochars were dissolved in FeSO <sub>4</sub> ·7H <sub>2</sub> O solution, then N <sub>2</sub> was purged into the solution for 1 h.                      | dropwise addition of 250 mL NaBH <sub>4</sub>                                    | rough and porous surface morphologies                  | 99.4% TCE was removed within 5 min at pH 6.2                                 | unknown                                                                                                         | <i>Bioresour. Technol.</i> 2015, 175, 269-274  |
| rice husk,<br>FeSO <sub>4</sub> ·7H <sub>2</sub> O | biochar was dissolved in FeSO <sub>4</sub> ·7H <sub>2</sub> O solution and stirred for 1 h. The solution was degassed by purging N <sub>2</sub> for 1 h. | NaBH <sub>4</sub> was added dropwise with vigorous stirring at room temperature. | rough and porous shape                                 | The degradation efficiency of Nonylphenol (20 mg/L) was 96.2% within 120 min | unknown                                                                                                         | <i>Chemical Eng. J.</i> 2017, 311, 163-172     |
| cornstalk,<br>FeCl <sub>3</sub> ·6H <sub>2</sub> O | biochars were soaked into FeCl <sub>3</sub> ·6H <sub>2</sub> O solution for 24 h under room temperature.                                                 | NaBH <sub>4</sub> was added dropwise, followed by stirring for another 30 min.   | nZVI/BC composites                                     | unknown                                                                      | removal efficiency (74.04%) of SMT was achieved at the optimal conditions pH 3                                  | <i>Sep. Purif. Technol.</i> 2018, 202, 130-137 |
| kenaf bar,<br>FeSO <sub>4</sub> ·7H <sub>2</sub> O | biochar was mixed with FeSO <sub>4</sub> ·7H <sub>2</sub> O to form a mixture of the biochar and iron                                                    | green tea extract was added under N <sub>2</sub> atmosphere                      | spherical particles were formed on the biochar surface | remove efficiencies of BPA could reach 98% in 60 min                         | unknown                                                                                                         | <i>Environ. Pollut.</i> 2018, 239, 698-705     |
| rice husk,<br>FeSO <sub>4</sub> ·7H <sub>2</sub> O | biochar was dispersed in oxygen free ultrapure water. Then, 0.0135 mol FeSO <sub>4</sub> ·7H <sub>2</sub> O was added at pH 5.0.                         | NaBH <sub>4</sub> was added dropwise. The solution was stirred for 2 h           | ZVI was homogeneously loaded on biochar surface        | unknown                                                                      | efficiently activate H <sub>2</sub> O <sub>2</sub> to achieve TCE degradation efficiency of 98.9% within 30 min | <i>Scientific Reports</i> 2017, 7, 43051       |

|                                                                                                 |                                                                                                                                                                                                                                                                                                |                                                                                   |                                                                 |                                                                                                 |                                                                                         |                                                            |
|-------------------------------------------------------------------------------------------------|------------------------------------------------------------------------------------------------------------------------------------------------------------------------------------------------------------------------------------------------------------------------------------------------|-----------------------------------------------------------------------------------|-----------------------------------------------------------------|-------------------------------------------------------------------------------------------------|-----------------------------------------------------------------------------------------|------------------------------------------------------------|
| gasification plant,<br>FeSO <sub>4</sub> ·7H <sub>2</sub> O                                     | biochar was dissolved in ethanol and 20 mL of 0.23 M FeSO <sub>4</sub> ·7H <sub>2</sub> O solution was added                                                                                                                                                                                   | NaBH <sub>4</sub> was added dropwise. The solution was stirred for another 20 min | nZVI were dispersed in the holes of the biochar tubes           | activation of PS for 1028.02 mg/L COD could be removed within 120 min.                          | unknown                                                                                 | <i>Chemical Eng. J.</i> 2019, 359, 1215-1223               |
| Melamine, d-glucose, FeCl <sub>3</sub> ·6H <sub>2</sub> O, FeCl <sub>2</sub> ·4H <sub>2</sub> O | Melamine, d-glucose, FeCl <sub>3</sub> ·6H <sub>2</sub> O and FeCl <sub>2</sub> ·4H <sub>2</sub> O were dissolved in water, followed by 1 h stirring. 28% ammonia solution was added dropwisely, and then transferred into a Teflon-lined autoclave and treated in an oven at 180 °C for 18 h. | annealed in N <sub>2</sub> atmosphere                                             | regular nanospheres were formed with a diameter around 20–30 nm | activation of oxone® for phenol degradation by complete removal of 20 ppm phenol within 10 min. | unknown                                                                                 | <i>Appl. Catal., B.</i> 2015, 172-173, 73-81.              |
| sugarcane residue, FeSO <sub>4</sub> ·7H <sub>2</sub> O                                         | sugarcane residue was impregnated in FeSO <sub>4</sub> ·7H <sub>2</sub> O solution and mixed for 24 h, and filtered by a vacuum suction and dried at 60 °C for 24 h.                                                                                                                           | pyrolyzed                                                                         | Fe-impregnated sugarcane biochar                                | unknown                                                                                         | High removal efficiency of 99.7% was achieved within 2 h at initial pH 5.5 under 25 °C. | <i>Bioresour. Technol.</i> 2018, 249, 368-376              |
| peanut shells, FeSO <sub>4</sub> ·7H <sub>2</sub> O                                             | 5.0 g FeSO <sub>4</sub> ·7H <sub>2</sub> O and 1.0 g biochar were put in 250 mL deionized water and stirred                                                                                                                                                                                    | NaBH <sub>4</sub> solution was added dropwise and stirred vigorously              | nZVI distributed on the sticks of the biochar                   | The removal of diatrizoate reached nearly 100% at pH 3.0 and 25 °C.                             | unknown                                                                                 | <i>Int. J. Environ. Res. Public Health</i> 2018, 15, 1937. |

Table s2. Properties of the as-synthesized nZVI/biochar OCF-850 and OCF-850 used.

|              | S <sub>BET</sub>  | Porosity | Pore Volume        | Pore Size | Elemental percentage (%) |      |       |
|--------------|-------------------|----------|--------------------|-----------|--------------------------|------|-------|
|              | m <sup>2</sup> /g | %        | cm <sup>3</sup> /g | nm        | C                        | O    | Fe    |
| OCF-850      | 140.84            | 22.3     | 0.044              | 2.55      | 70.18                    | 8.22 | 16.41 |
| OCF-850 used | 137.49            | 21.9     | 0.038              | 2.40      | 70.77                    | 8.93 | 15.95 |

Table s3. The degradation of BPA under various conditions.

| pH | PMS amount                           | Fe <sup>2+</sup> Addition | Catalyst Addition | Rate / min <sup>-1</sup> |
|----|--------------------------------------|---------------------------|-------------------|--------------------------|
| 4  | 40 mg                                | 0 mg/L                    | 0.05 g            | 1.299±0.024              |
| 4  | 40 mg                                | 0 mg/L                    | 0                 | 0.131±0.022              |
| 4  | 40 mg                                | 3.11 mg/L                 | 0                 | 0.178±0.020              |
| 7  | 40 mg                                | 0 mg/L                    | 0.05 g            | 0.351±0.032              |
| 7  | 40 mg                                | 0 mg/L                    | 0                 | 0.0452±0.0013            |
| 7  | 40 mg                                | 0.27 mg/L                 | 0                 | 0.0598±0.0054            |
| 10 | 40 mg                                | 0 mg/L                    | 0.05 g            | 0.316±0.029              |
| 10 | 40 mg                                | 0 mg/L                    | 0                 | 0.0320±0.0024            |
| 10 | 40 mg                                | 0.053 mg/L                | 0                 | 0.0383±0.0022            |
| pH | H <sub>2</sub> O <sub>2</sub> amount | Fe <sup>2+</sup> Addition | Catalyst Addition | Rate / min <sup>-1</sup> |
| 4  | 1 ml 3%                              | 0 mg/L                    | 0.05 g            | 1.105±0.048              |
| 4  | 1 ml 3%                              | 0 mg/L                    | 0                 | 0.104±0.0083             |
| 4  | 1 ml 3%                              | 3.42 mg/L                 | 0                 | 0.127±0.036              |
| 7  | 1 ml 3%                              | 0 mg/L                    | 0.05 g            | 0.194±0.014              |
| 7  | 1 ml 3%                              | 0 mg/L                    | 0                 | 0.0474±0.0055            |
| 7  | 1 ml 3%                              | 0.34 mg/L                 | 0                 | 0.0480±0.0014            |
| 10 | 1 ml 3%                              | 0 mg/L                    | 0.05 g            | 0.053±0.0017             |
| 10 | 1 ml 3%                              | 0 mg/L                    | 0                 | 0.00946±0.00043          |
| 10 | 1 ml 3%                              | 0.063 mg/L                | 0                 | 0.00987±0.0024           |

Note: all of the tests were conducted in triplicate.

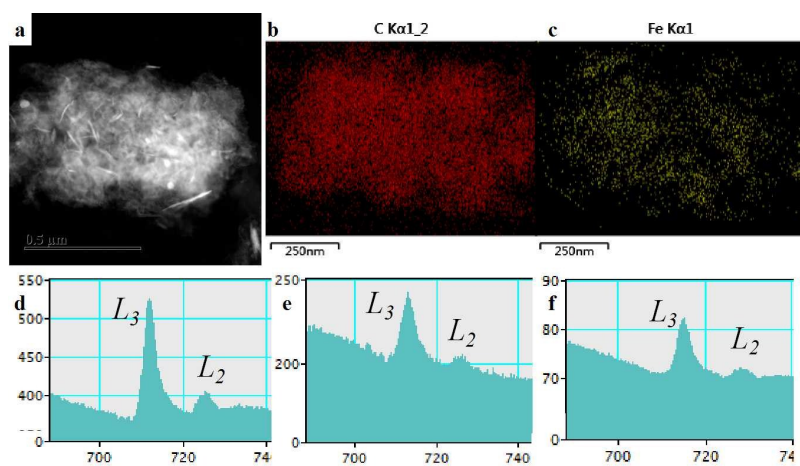

Fig. s1. STEM-EDS elemental mapping of the as-synthesized 2D nZVI/biochar OCF-850(a), (b) C, (c) Fe, and typical EELS spectra of the OCF-850 (d-f).

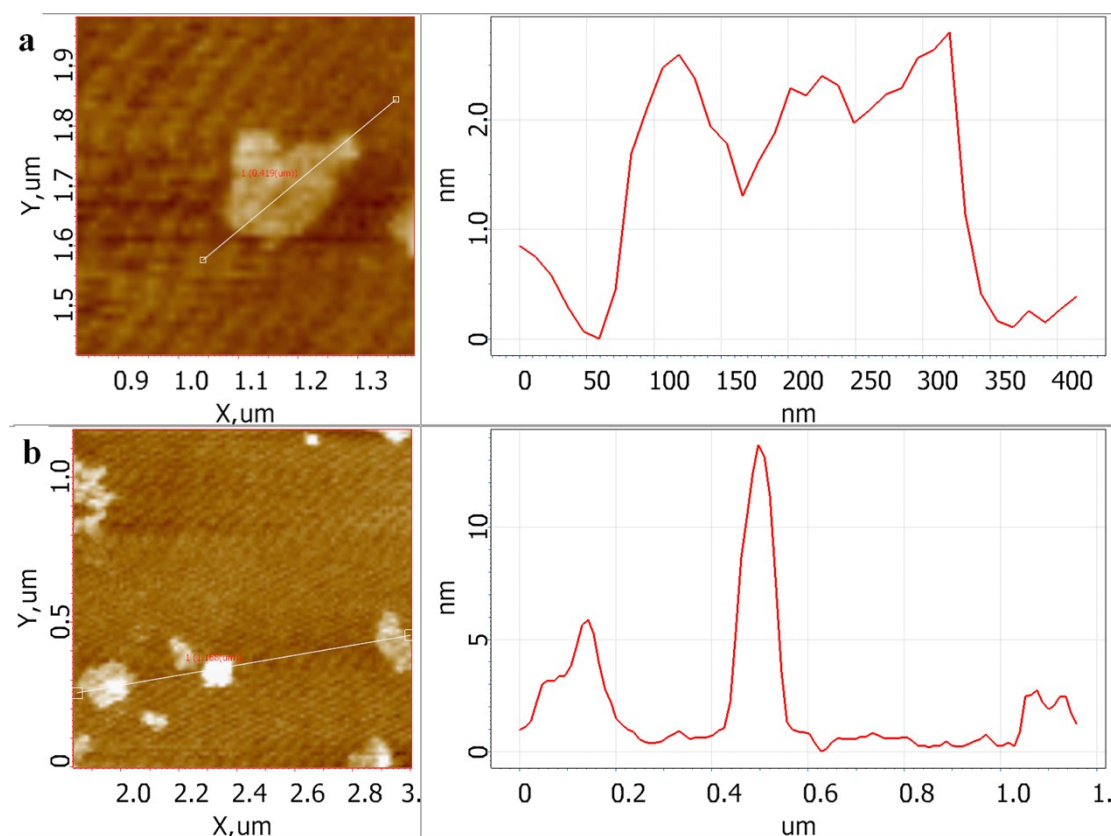

Fig. s2. Typical AFM images of the as-synthesized OCF-850 and the corresponding section analyses.

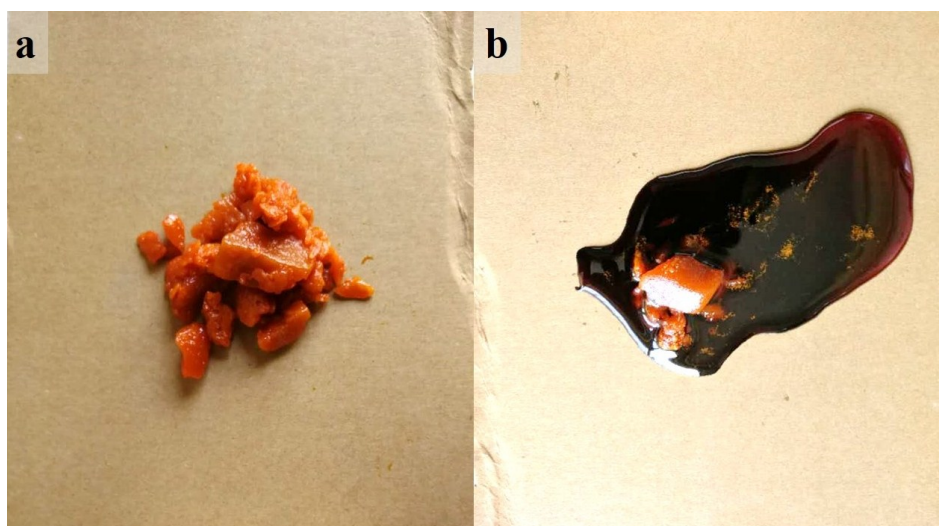

Fig. s3. Photographs of fresh  $\text{FeCl}_3 \cdot 6\text{H}_2\text{O}$  stark on the surface of the OCC (a) and after exposure to the air after 1 h (b).



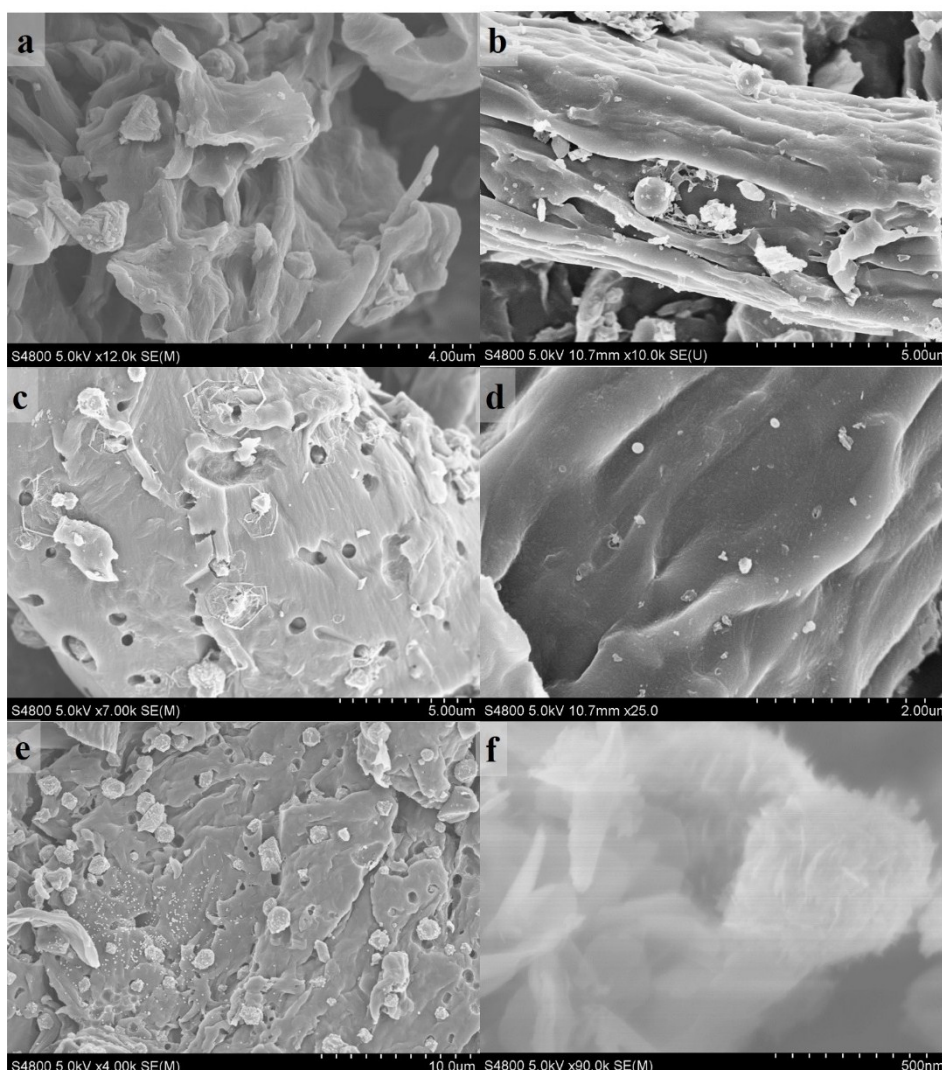

Fig. s4. SEM images of the OCC-derived materials produced under different conditions, (a) OCC-850, (b) carbonization of  $\text{FeCl}_3 \cdot 6\text{H}_2\text{O}$  loaded OCC at  $850\text{ }^\circ\text{C}$  and then shearing 10 min; (c) carbonization of  $\text{Fe}(\text{NO}_3)_3 \cdot 9\text{H}_2\text{O}$  loaded OCC at  $850\text{ }^\circ\text{C}$  and then shearing 10 min; (d) carbonization of  $\text{CuCl}_2 \cdot 2\text{H}_2\text{O}$  loaded OCC at  $850\text{ }^\circ\text{C}$  and then shearing 10 min; (e) carbonization of  $\text{Fe}(\text{NO}_3)_3 \cdot 9\text{H}_2\text{O}$  and  $\text{CuCl}_2 \cdot 2\text{H}_2\text{O}$  loaded OCC at  $850\text{ }^\circ\text{C}$  and then shearing 10 min; and (f) of shearing mixing of  $\text{Fe}(\text{NO}_3)_3 \cdot 9\text{H}_2\text{O}$  and  $\text{CuCl}_2 \cdot 2\text{H}_2\text{O}$  loaded OCC for 10 min and then carbonization at  $850\text{ }^\circ\text{C}$ .

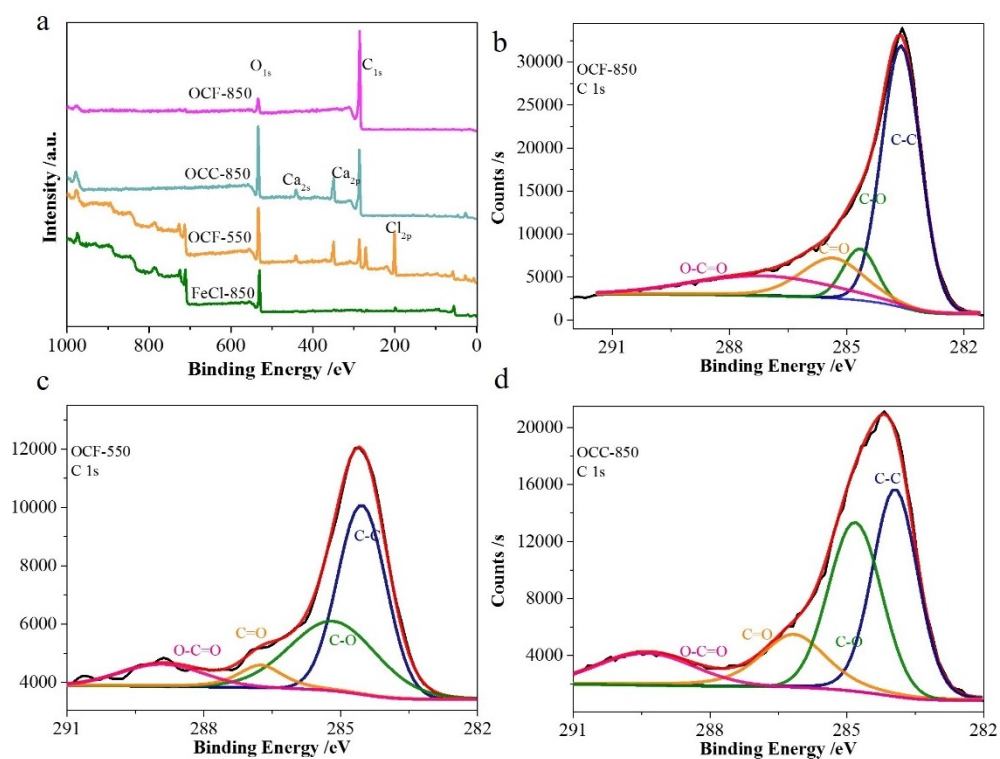

Fig. s5. XPS spectra of the as-synthesized materials (a), the high resolution C 1s spectra of OCF-850 (b), OCF-550 (c) and OCC-850 (d).

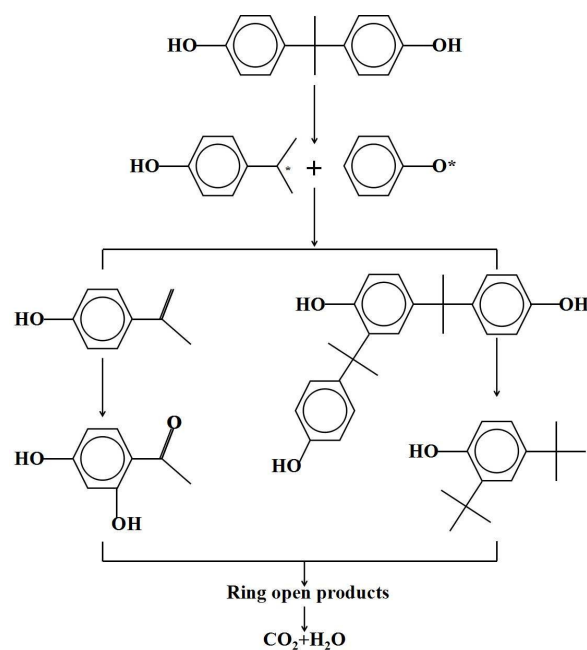

Fig. s6. Possible degradation pathway of BPA induced by the activation of PMS over OCF-850.

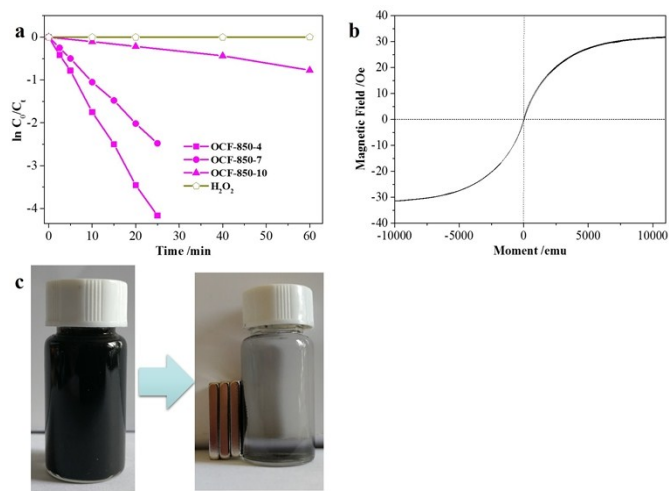

Figure s7. (a) The relative concentration profiles of BPA during typical Fenton degradation processes under dark conditions, (b) the magnetic hysteresis loop of OCF-850, and (c) the magnetic separation of the OCF-850 dispersed in a  $\text{C}_2\text{H}_5\text{OH}$  solution.

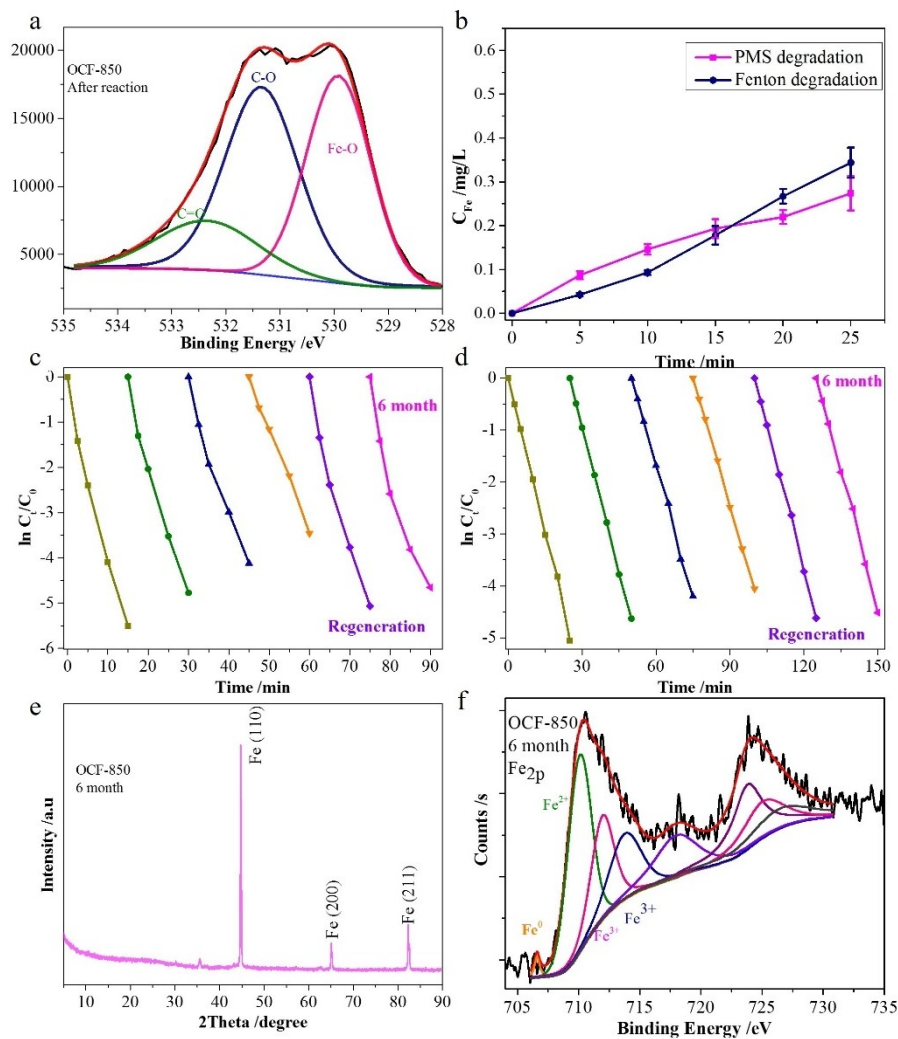

Fig. S8. The high resolution O 1s spectra of OCF-850 after typical PMS degradation process (a), Leaching of Fe ions during the degradation process (b), Cyclic degradation in repetitive degradation of BPA during typical PMS degradation processes (c), during typical Fenton degradation processes (d), the XRD spectrum of OCF-850 after 6 month (e), and the high resolution Fe2p spectra after 6 month (f).

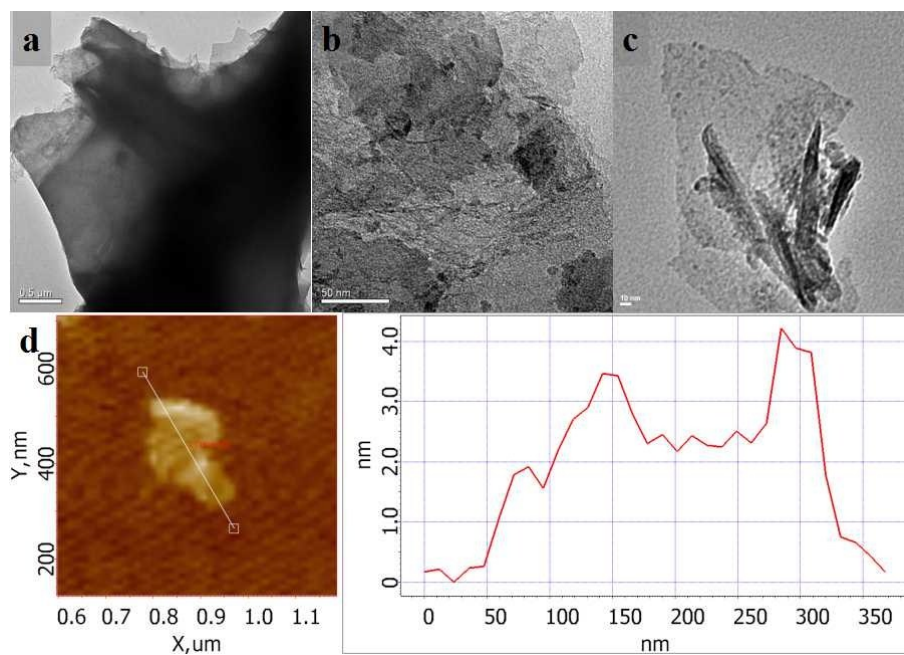

Figure s9. Typical TEM images (a-c) and AFM image (d) of the OCF-850 after the catalysis.
